# Supplementary material for: Investigation of pharmacokinetic drug interaction between clesacostat and DGAT2 inhibitor ervogastat in healthy adult participants
Source: PubMed Central journal article supplement — Clin Transl Sci. 2024 Feb 16;17(2):e13687. doi: 10.1111/cts.13687 (PMC10870243; doi:10.1111/cts.13687), 2024-02-16
Supplement: CTS-17-e13687-s001.pdf [file CTS-17-e13687-s001.pdf]

**Figure S1** Concentration–time profiles by participant for Cohort 1 on (a) day 7 and (b) day 14 and Cohort 2 on (c) day 7 and (d) day 14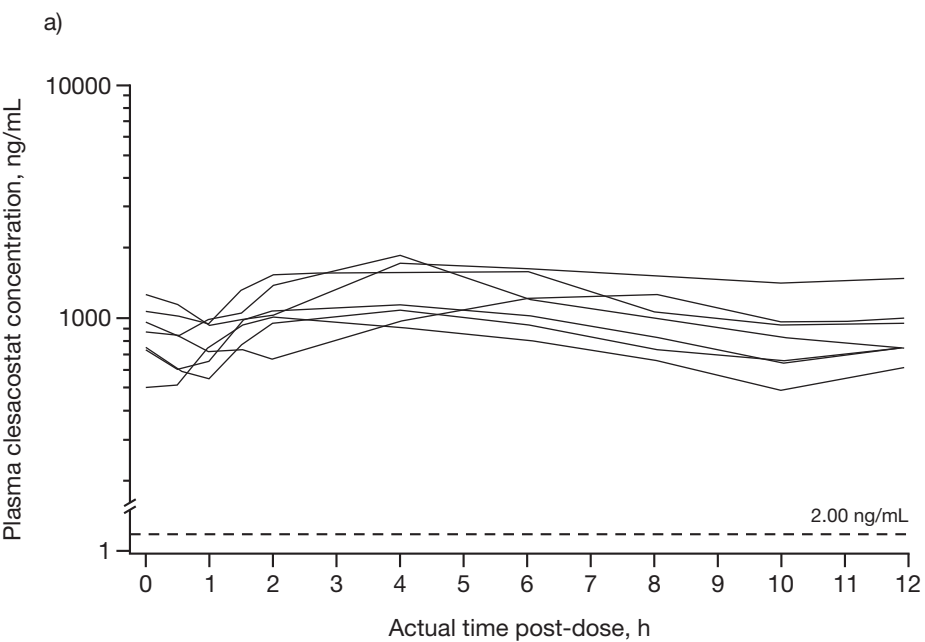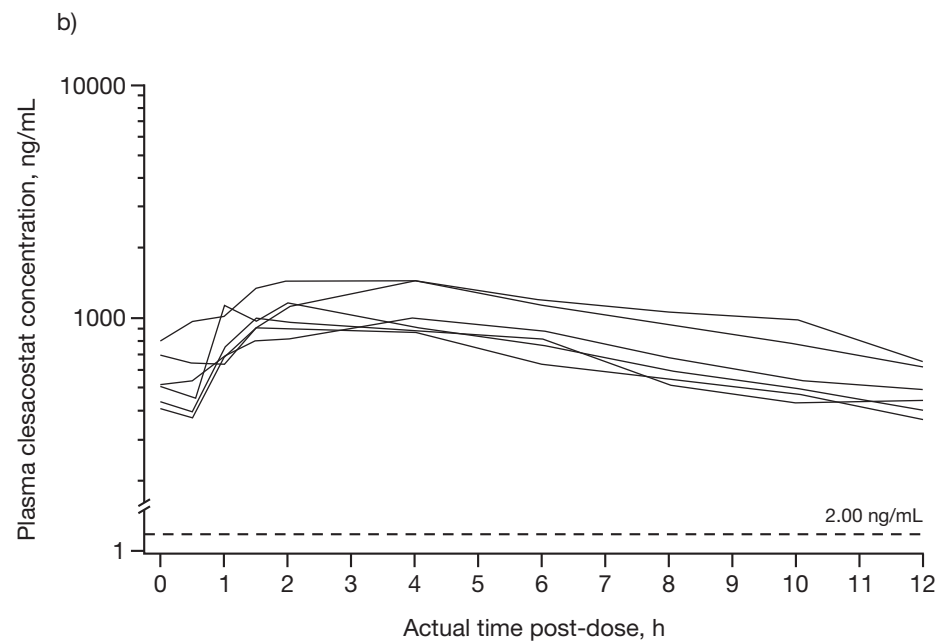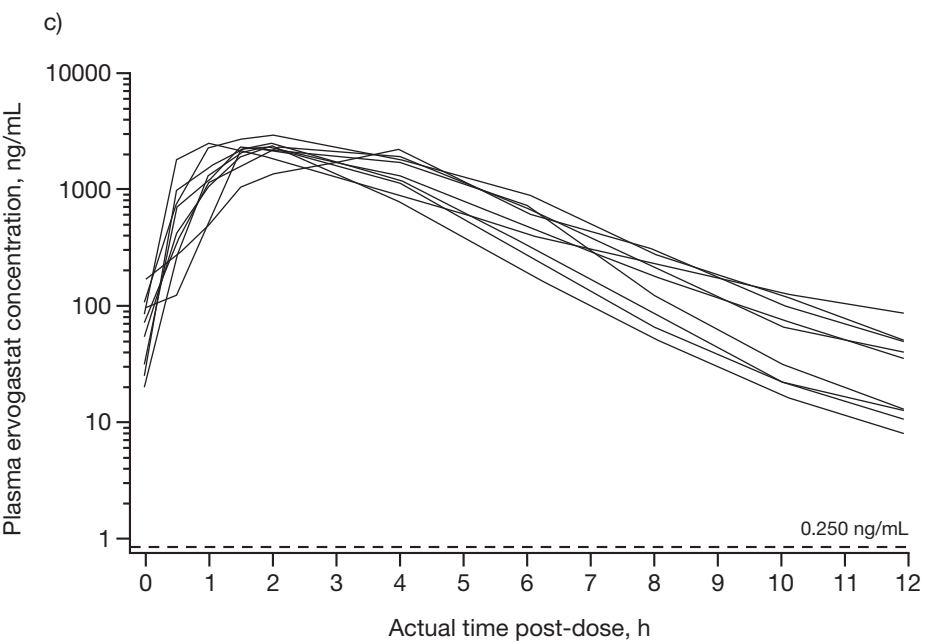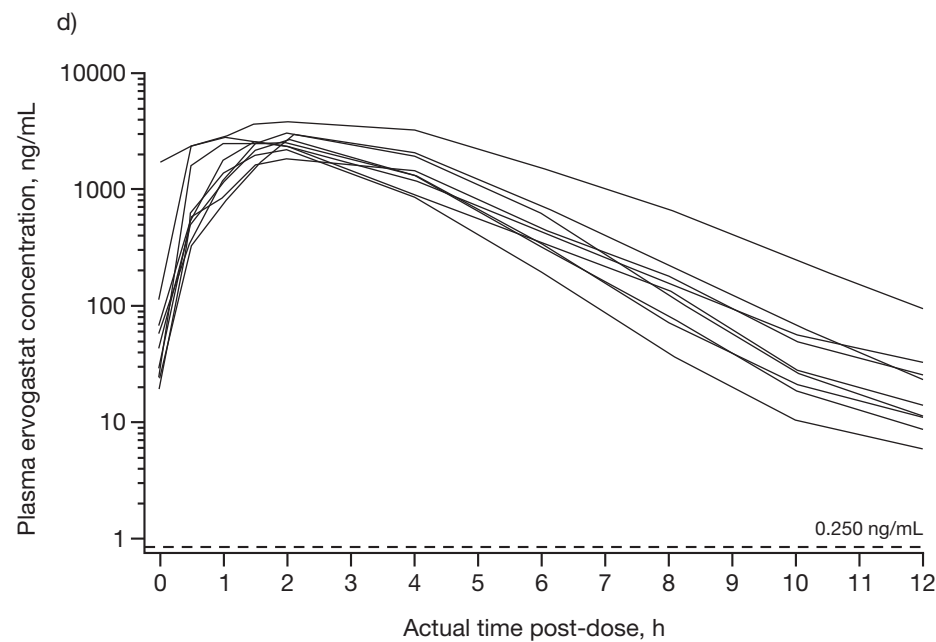

Dashed lines represent LLOQ for plasma clesacostat and ervogastat concentrations. The LLOQ for plasma clesacostat concentrations was 2.00 ng/mL; the LLOQ for plasma ervogastat concentrations was 0.250 ng/mL.

LLOQ, lower limit of quantification; h, hour
